# Supplementary material
Source: PubMed Central journal article supplement (PMC5321582)
Supplement: NIHMS71333-supplement-Supplementary_figure_2.pdf [file NIHMS71333-supplement-Supplementary_figure_2.pdf]

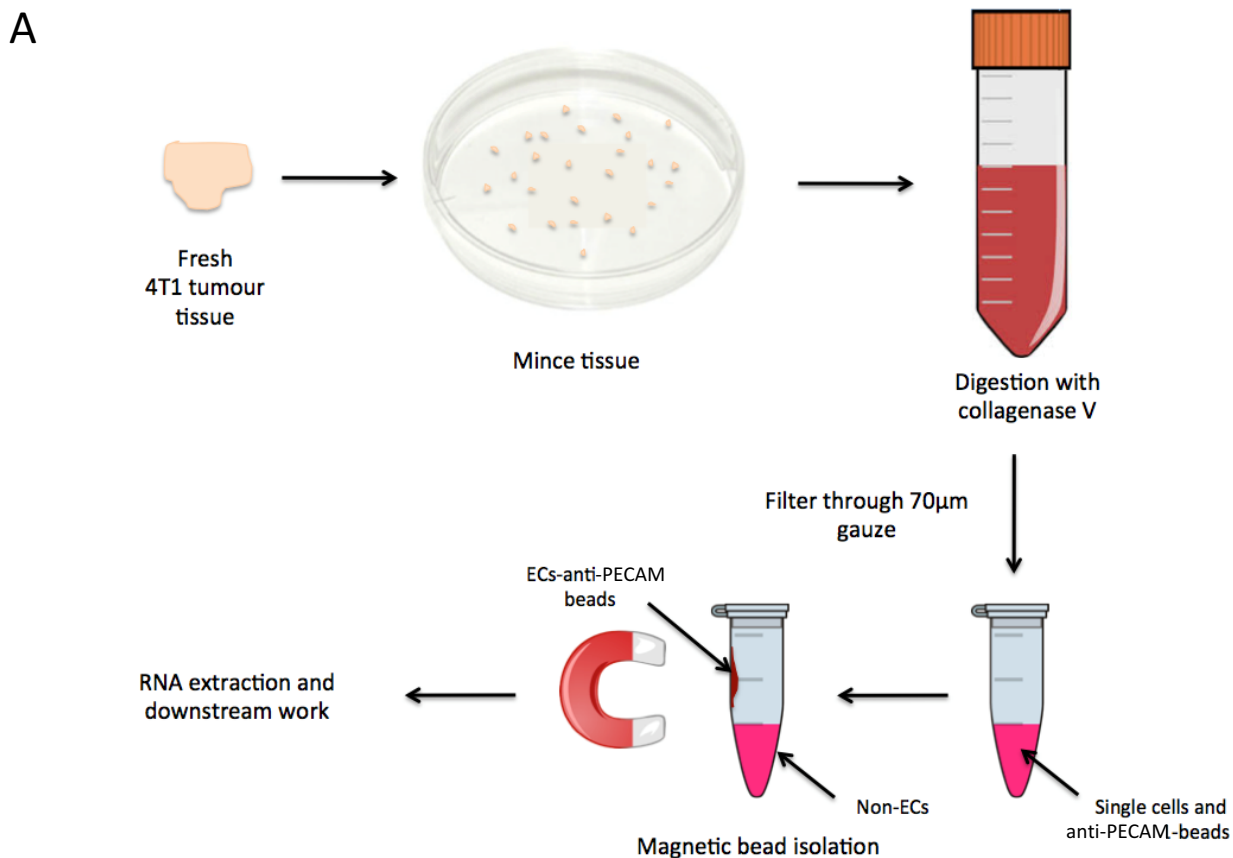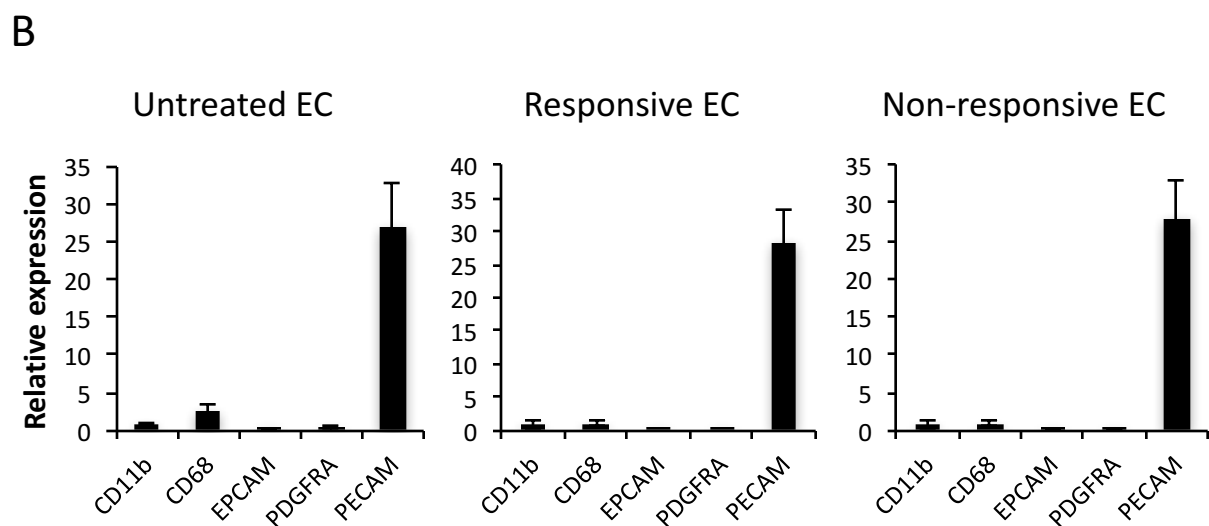

**Supplementary figure 2:** Endothelial isolation from murine breast tumours. A, workflow of the main steps involved in the murine endothelial cell isolation procedure. B, RTqPCR for markers of leukocytes (CD11b), macrophages (CD68), epithelium (EPCAM), smooth muscle (PDGFRA) and endothelium (PECAM) in the endothelial isolates (EC) from responsive, untreated and non-responsive tumours (n=4,4,4) standardised to  $\beta$ -actin (a house keeping gene) and normalised for marker expression to matched bulk tissue. Mean fold change of marker expression between the endothelial and bulk fraction is shown  $\pm$  SEM.
