# Supplementary material
Source: PubMed Central journal article supplement (PMC5321582)
Supplement: NIHMS71333-supplement-Supplementary_figure_3.pdf [file NIHMS71333-supplement-Supplementary_figure_3.pdf]

### Tumour growth curves for samples used in 1300 mm<sup>3</sup> microarray analysis

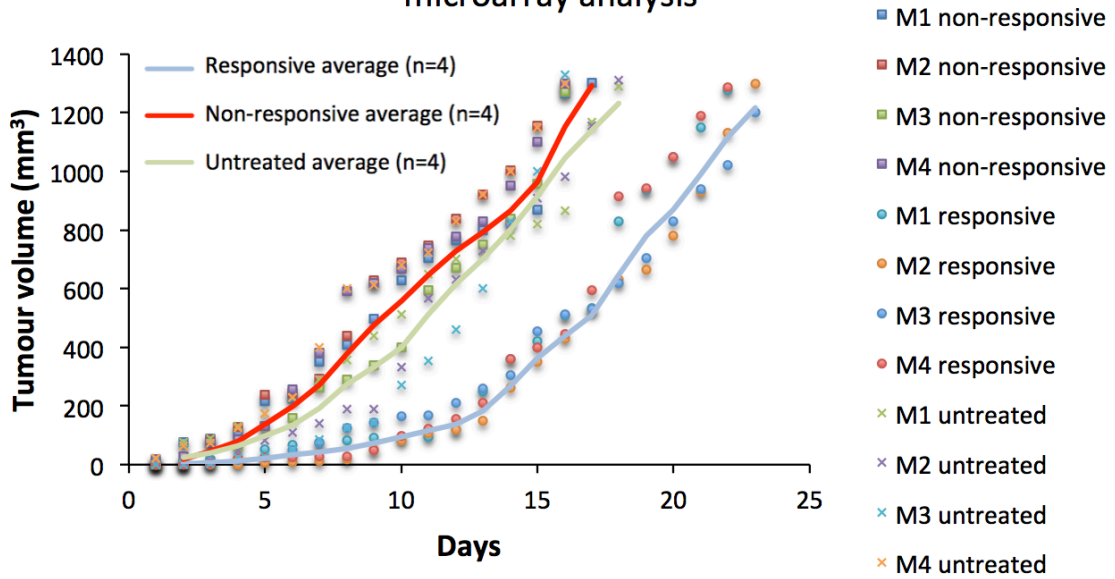

### Tumour growth curves for 9 days and 600 mm<sup>3</sup> microarrays

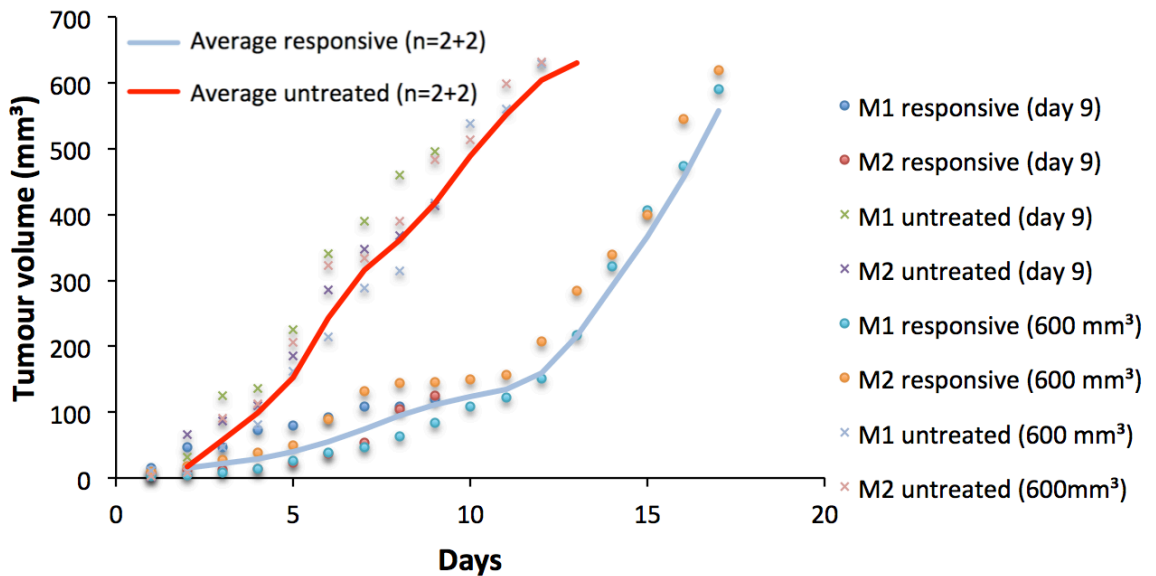

**Supplementary figure 3:** Representative tumours from the non-responsive (square), responsive (circle) and untreated (cross) group at each time period, were subjected to microarray transcriptomic analysis. Graphs showing individual tumour growth data points and mean tumour size of the selected tumours over the period of the experiment. N-numbers for each experiment are shown.
