# Supplementary material
Source: PubMed Central journal article supplement (PMC5321582)
Supplement: NIHMS71333-supplement-Supplementary_table_1.pdf [file NIHMS71333-supplement-Supplementary_table_1.pdf]

**Supplementary table 1.** Murine RTqPCR primers used for the research detailed in this paper.

| Target name    | Primer sequences              | Probe number |
|----------------|-------------------------------|--------------|
| CD11b          | Fwd: gcacctcggtatcagcatatt    | 9            |
|                | Rev: cccaggtaccgaaattctcc     |              |
| CD68           | Fwd: ttctcttgcaaccgtgacc      | 34           |
|                | Rev: gaggaggaccaggccaat       |              |
| EPCAM          | Fwd: ggttagcgcttccgaggta      | 53           |
|                | Rev: tggtagtagtcaaggccagt     |              |
| PDGFRA         | Fwd: aacggggctagaagtcaacc     | 4            |
|                | Rev: tgacatgaagccaagaacttaaac |              |
| PECAM          | Fwd: gctggtgctctatgcaagc      | 30           |
|                | Rev: atggatgctgttgatgggta     |              |
| $\beta$ -ACTIN | Fwd: ggagggggttgagggtt        | 71           |
|                | Rev: gtgtgcacttttattggctcaa   |              |
| LEPR           | Fwd: cctccatctaacgtaaagcaga   | 47           |
|                | Rev: tggcttttccaagatacttc     |              |
| PRLR           | Fwd: gccttctgctctgtctcac      | 55           |
|                | Rev: cctgagccccgtgtaaaat      |              |
| ESAM           | Fwd: tgattcttcaggctggaacc     | 54           |
|                | Rev: tcagtcgccaggaacaaaacc    |              |
| PTN            | Fwd: tgtcactttgctctccttgg     | 55           |
|                | Rev: agtgggcttctctggcttc      |              |
| AQP1           | Fwd: atcaactcagcaccctcactc    | 25           |
|                | Rev: caggtgggtccctcacttt      |              |
| ANGPT2         | Fwd: aagagcgtggacagcacag      | 8            |
|                | Rev: gtagctgcagggtccgttc      |              |
| DARC           | Fwd: cttcaccttgggactcagtg     | 32           |
|                | Rev: gactggcagccctaagagg      |              |
| ECSCR          | Fwd: gctagacactggcctgctc      | 18           |
|                | Rev: ttgactcctcgttctctgagttt  |              |
| TSPAN7         | Fwd: ttggatgctttgctacatgc     | 89           |
|                | Rev: gggacaggaacatggcatac     |              |
| STC2           | Fwd: catgccctgcgtcataaat      | 18           |
|                | Rev: catttcctaattgctggaca     |              |
| RET            | Fwd: cacagcccagcaacttacg      | 2            |
|                | Rev: ggccttgagaattctgctct     |              |
| MMRN2          | Fwd: agcccctcaccatgatcc       | 3            |
|                | Rev: agtcccagctcaggtacac      |              |
| VEGFR2         | Fwd: accagagaccctcgttttca     | 22           |
|                | Rev: catttgcttcaggagggtt      |              |
| EDN1           | Fwd: cagcatccttgatccaaca      | 30           |
|                | Rev: gacgcagacaggctaggg       |              |
