# Supplementary material
Source: PubMed Central journal article supplement (PMC5321582)
Supplement: NIHMS71333-supplement-Supplementary_tables_2__3_and_4.pdf [file NIHMS71333-supplement-Supplementary_tables_2__3_and_4.pdf]

**Supplementary table 2.** Expression change of genes on which sunitinib has a known or predicted effect, in tumour bulk harvested at each time-point. Log<sub>2</sub> fold change in gene expression shown.

| Gene ID                                       | Gene symbol | GeneBank accession no. | Predicted sunitinib effect | Responsive vs Untreated 9 days | Responsive vs Untreated 600 mm <sup>3</sup> | Responsive vs Untreated 1300 mm <sup>3</sup> |
|-----------------------------------------------|-------------|------------------------|----------------------------|--------------------------------|---------------------------------------------|----------------------------------------------|
| kit oncogene                                  | KIT         | NM_001122733           | Downregulated              | -2.33                          | -0.78                                       | 0.27                                         |
| platelet derived growth factor receptor, beta | PDGFRB      | NM_001146268           | Downregulated              | -2.11                          | -0.41                                       | -0.60                                        |
| CD69 antigen                                  | CD69        | NM_001033122           | Downregulated              | -2.00                          | 0.47                                        | 0.47                                         |
| Vascular endothelial growth factor receptor 2 | VEGFR2      | NM_010612              | Downregulated              | -1.63                          | -0.18                                       | -0.95                                        |
| FMS-like tyrosine kinase 3                    | Flt3        | NM_010229              | Downregulated              | -1.53                          | -0.21                                       | -0.82                                        |
| colony stimulating factor 1 receptor          | Csf1r       | NM_001037859           | Downregulated              | -1.35                          | -0.91                                       | -0.82                                        |
| interleukin 2 receptor, alpha                 | IL2RA       | NM_008367              | Downregulated              | -1.28                          | -0.24                                       | 0.99                                         |

**Supplementary table 3.** Expression change of genes on which sunitinib has a predicted effect, in EC isolates from tumours harvested at 1300 mm<sup>3</sup>. Log<sub>2</sub> fold change in gene expression shown.

| Gene ID                               | Gene symbol | GeneBank accession no. | Predicted sunitinib effect | Non-responsive vs. Untreated EC | Responsive vs. Untreated EC | Non-responsive vs. Responsive EC |
|---------------------------------------|-------------|------------------------|----------------------------|---------------------------------|-----------------------------|----------------------------------|
| chemokine (C-X-C motif) ligand 3      | CXCL3       | NM_203320              | Downregulated              | -1.97                           | -0.35                       | -1.62                            |
| FMS-like tyrosine kinase 1            | FLT1        | AK005502               | Downregulated              | -0.95                           | 0.89                        | -1.84                            |
| kinase insert domain protein receptor | KDR         | NM_010612              | Downregulated              | -0.14                           | 1.04                        | -1.18                            |
| FMS-like tyrosine kinase 3            | FLT3        | AK045865               | Downregulated              | -1.04                           | -0.01                       | -1.04                            |
| ret proto-oncogene                    | RET         | NM_001080780           | Downregulated              | 0.60                            | 1.26                        | -0.41                            |
| baculoviral IAP repeat-containing 5   | BIRC5       | NM_001012273           | Downregulated              | 1.15                            | 0.20                        | 0.97                             |
| BCL2-like 11 (apoptosis facilitator)  | BCL2L11     | NM_207680              | Upregulated                | 1.30                            | -0.33                       | 1.64                             |

**Supplementary table 4.** Expression change of genes that enhance metastasis in tumour bulk harvested at each time-point. Log<sub>2</sub> fold change in gene expression shown.

| Gene ID                                    | Gene symbol | GeneBank accession no. | Effect on metastasis | Responsive vs. Untreated 9 days | Responsive vs. Untreated 600 mm <sup>3</sup> | Responsive vs. Untreated 1300 mm <sup>3</sup> |
|--------------------------------------------|-------------|------------------------|----------------------|---------------------------------|----------------------------------------------|-----------------------------------------------|
| bone morphogenetic protein 2               | BMP2        | NM_007553              | Increased            | -3.30                           | -0.45                                        | -1.05                                         |
| snail homolog 2 (Drosophila)               | SNAI2       | NM_011415              | Increased            | -2.91                           | 0.08                                         | 0.46                                          |
| ubiquitin D                                | UBD         | NM_023137              | Increased            | -2.06                           | 0.72                                         | 0.04                                          |
| thymus cell antigen 1, theta               | THY1        | NM_009382              | Increased            | -1.98                           | -0.67                                        | 0.19                                          |
| collagen triple helix repeat containing 1  | CTHRC1      | NM_026778              | Increased            | -1.37                           | -0.71                                        | -0.70                                         |
| nitric oxide synthase 3, endothelial cell  | NOS3        | NM_008713              | Increased            | -1.34                           | -0.32                                        | -0.24                                         |
| angiopoietin-like 4                        | ANGPTL4     | NM_020581              | Increased            | -1.32                           | -1.04                                        | 0.22                                          |
| heparanase                                 | HPSE        | NM_152803              | Increased            | -1.30                           | -0.18                                        | -0.21                                         |
| O-6-methylguanine-DNA methyltransferase    | MGMT        | NM_008598              | Increased            | -1.28                           | -0.52                                        | -0.08                                         |
| tumor necrosis factor superfamily, 11      | TNFSF11     | NM_011613              | Increased            | -1.27                           | 0.29                                         | 0.36                                          |
| zeta-chain (TCR) associated protein kinase | ZAP70       | NM_009539              | Increased            | -1.27                           | 0.19                                         | 0.89                                          |
| CD274 antigen                              | CD274       | NM_021893              | Increased            | -1.25                           | -0.21                                        | 0.00                                          |
| Fyn proto-oncogene                         | FYN         | NM_001122893           | Increased            | -1.13                           | -0.35                                        | -0.08                                         |
| tumor necrosis factor                      | TNF         | NM_013693              | Increased            | -1.11                           | -0.30                                        | 0.96                                          |
| chemokine (C-X-C motif) receptor 4         | CXCR4       | NM_009911              | Increased            | -1.07                           | -0.73                                        | 0.00                                          |
| matrix metalloproteinase 2                 | MMP2        | NM_008610              | Increased            | -0.29                           | -1.14                                        | -0.40                                         |
| chemokine (C-X-C motif) ligand 1           | CXCL1       | NM_008176              | Increased            | 0.25                            | 1.08                                         | 0.77                                          |
| TOX high mobility group box 4              | TOX4        | NM_023434              | Increased            | 0.31                            | -0.02                                        | 1.95                                          |
| chemokine (C-X-C motif) ligand 3           | CXCL3       | NM_203320              | Increased            | 0.40                            | 1.41                                         | 0.07                                          |
| lysyl oxidase                              | LOX         | NM_010728              | Increased            | 0.41                            | -1.05                                        | -0.29                                         |
| c-fos induced growth factor                | FIGF        | NM_010216              | Increased            | 0.42                            | -1.21                                        | -0.36                                         |
| syndecan binding protein                   | SDCBP       | AK014678               | Increased            | 0.60                            | -0.06                                        | 1.11                                          |
| leukotriene B4 receptor 2                  | LTB4R2      | NM_020490              | Increased            | 0.74                            | -0.69                                        | 1.29                                          |
| CD151 antigen                              | CD151       | NM_009842              | Increased            | 1.03                            | 0.13                                         | 0.21                                          |
| inositol hexaphosphate kinase 2            | IP6K2       | NM_029634              | Increased            | 1.05                            | -0.15                                        | 0.04                                          |
| chemokine (C-X-C motif) ligand 5           | CXCL5       | NM_009141              | Increased            | 1.07                            | 0.32                                         | 0.04                                          |
| S100 calcium binding protein A4            | S100A4      | NM_011311              | Increased            | 1.13                            | 0.38                                         | 0.33                                          |
| bone morphogenetic protein 7               | BMP7        | NM_007557              | Increased            | 2.34                            | -0.14                                        | 0.54                                          |
