# Supplementary material
Source: PubMed Central journal article supplement (PMC5321582)
Supplement: NIHMS71333-supplement-Supplementary_tables_5_and_6.pdf [file NIHMS71333-supplement-Supplementary_tables_5_and_6.pdf]

**Supplementary table 5.** Expression change of genes that enhance metastasis in tumour bulk harvested at 1300 mm<sup>3</sup>. Log2 fold change in gene expression shown.

| Gene ID                                        | Gene symbol | GeneBank accession no. | Effect of metastasis | Non-responsive vs. Untreated W | Responsive vs. Untreated W | Non-responsive vs. Responsive W |
|------------------------------------------------|-------------|------------------------|----------------------|--------------------------------|----------------------------|---------------------------------|
| TOX high mobility group box family member 4    | TOX4        | NM_023434              | Increased            | -1.96                          | 1.95                       | -3.94                           |
| insulin-like growth factor 1                   | IGF1        | NM_010512              | Increased            | -1.52                          | 0.10                       | -1.62                           |
| cadherin 2                                     | CDH2        | NM_007664              | Increased            | -1.12                          | -0.11                      | -1.01                           |
| neurotrophic tyrosine kinase, receptor, type 2 | NTRK2       | NM_001025074           | Increased            | -1.12                          | 0.64                       | -1.74                           |
| leukotriene B4 receptor 2                      | LTBR2       | NM_020490              | Increased            | -1.01                          | 1.29                       | -2.04                           |
| bone morphogenetic protein 2                   | BMP2        | NM_007553              | Increased            | -0.02                          | -1.05                      | 0.91                            |
| syndecan binding protein                       | SDCBP       | AK014678               | Increased            | 0.77                           | 1.11                       | -0.51                           |
| netrin 1                                       | NTN1        | NM_008744              | Increased            | 1.01                           | 0.30                       | 0.72                            |
| CD44 antigen                                   | CD44        | NM_009851              | Increased            | 1.02                           | 0.17                       | 0.85                            |
| Notch gene homolog 1 (Drosophila)              | NOTCH1      | NM_008714              | Increased            | 1.16                           | 0.75                       | 0.40                            |
| ubiquitin D                                    | UBD         | NM_023137              | Increased            | 1.23                           | 0.04                       | 1.17                            |
| melanoma cell adhesion molecule                | MCAM        | NM_023061              | Increased            | 1.27                           | -0.05                      | 1.35                            |
| chemokine (C-X-C motif) ligand 5               | CXCL5       | NM_009141              | Increased            | 1.55                           | 0.04                       | 1.52                            |

**Supplementary table 6.** Expression change of genes that enhance endothelial migration in tumour bulk harvested at each time-point. Log2 fold change in gene expression shown.

| Gene ID                                          | Gene symbol | GeneBank accession no. | Effect on endothelial migration | Responsive vs. Untreated 9 days | Responsive vs. Untreated 600 mm <sup>3</sup> | Responsive vs. Untreated 1300 mm <sup>3</sup> |
|--------------------------------------------------|-------------|------------------------|---------------------------------|---------------------------------|----------------------------------------------|-----------------------------------------------|
| tenascin N                                       | TNN         | NM_177839              | Increased                       | -3.45                           | -0.42                                        | -0.14                                         |
| bone morphogenetic protein 2                     | BMP2        | NM_007553              | Increased                       | -3.30                           | -0.45                                        | -1.05                                         |
| matrix metalloproteinase 13                      | MMP13       | NM_008607              | Increased                       | -2.90                           | 1.24                                         | -0.75                                         |
| wingless-related MMTV integration site 5A        | WNT5A       | NM_009524              | Increased                       | -2.86                           | -0.36                                        | 0.17                                          |
| endothelial cell-specific adhesion molecule      | ESAM        | NM_027102              | Increased                       | -2.62                           | -0.29                                        | -1.08                                         |
| integrin alpha 9                                 | ITGA9       | NM_133721              | Increased                       | -2.33                           | 0.20                                         | -0.47                                         |
| EGF-like domain 7                                | EGFL7       | NM_178444              | Increased                       | -2.00                           | -0.38                                        | -0.42                                         |
| elastin                                          | ELN         | NM_007925              | Increased                       | -1.65                           | -1.04                                        | -0.15                                         |
| growth arrest specific 6                         | GAS6        | NM_019521              | Increased                       | -1.64                           | -0.75                                        | 0.12                                          |
| phosphoinositide-3-kinase, catalytic, gamma      | PIK3CG      | NM_020272              | Increased                       | -1.63                           | -0.46                                        | -0.34                                         |
| tumor necrosis factor (ligand) superfamily, 10   | TNFSF10     | NM_009425              | Increased                       | -1.62                           | 1.01                                         | -0.03                                         |
| tachykinin 1                                     | TAC1        | NM_009311              | Increased                       | -1.60                           | 0.35                                         | 0.01                                          |
| insulin-like growth factor binding protein 3     | IGFBP3      | NM_008343              | Increased                       | -1.59                           | -0.79                                        | -0.43                                         |
| Rac/Cdc42 guanine nucleotide exchange factor 6   | ARHGEF6     | NM_152801              | Increased                       | -1.52                           | -0.08                                        | 0.18                                          |
| sphingosine-1-phosphate receptor 3               | S1PR3       | NM_010101              | Increased                       | -1.50                           | -1.03                                        | 0.16                                          |
| sphingosine-1-phosphate receptor 1               | S1PR1       | NM_007901              | Increased                       | -1.44                           | -0.70                                        | -0.96                                         |
| endothelial-specific receptor tyrosine kinase    | TEK         | NM_013690              | Increased                       | -1.42                           | -0.45                                        | -0.38                                         |
| nitric oxide synthase 3, endothelial cell        | NOS3        | NM_008713              | Increased                       | -1.34                           | -0.32                                        | -0.24                                         |
| heparanase                                       | HPSE        | NM_152803              | Increased                       | -1.30                           | -0.18                                        | -0.21                                         |
| chemokine (C-C motif) ligand 5                   | CCL5        | NM_013653              | Increased                       | -1.25                           | -0.15                                        | 0.43                                          |
| phosphodiesterase 2A, cGMP-stimulated            | PDE2A       | NM_001143848           | Increased                       | -1.21                           | -0.77                                        | -0.62                                         |
| protein kinase D1                                | PRKD1       | NM_008858              | Increased                       | -1.13                           | -0.07                                        | -0.51                                         |
| GATA binding protein 1                           | GATA1       | NM_008089              | Increased                       | -0.82                           | -1.45                                        | -0.60                                         |
| pleiotrophin                                     | PTN         | NM_008973              | Increased                       | -0.34                           | -0.15                                        | 3.23                                          |
| matrix metalloproteinase 2                       | MMP2        | NM_008610              | Increased                       | -0.29                           | -1.14                                        | -0.40                                         |
| chemokine (C-X-C motif) ligand 1                 | CXCL1       | NM_008176              | Increased                       | 0.25                            | 1.08                                         | 0.77                                          |
| teratocarcinoma-derived growth factor 1          | TDGF1       | NM_011562              | Increased                       | 0.30                            | 0.56                                         | 1.03                                          |
| lysyl oxidase                                    | LOX         | NM_010728              | Increased                       | 0.41                            | -1.05                                        | -0.29                                         |
| c-fos induced growth factor                      | FIGF        | NM_010216              | Increased                       | 0.42                            | -1.21                                        | -0.36                                         |
| gastrin releasing peptide                        | GRP         | NM_175012              | Increased                       | 0.49                            | 0.47                                         | -2.22                                         |
| syndecan 4                                       | SDC4        | NM_011521              | Increased                       | 0.73                            | -0.55                                        | 1.01                                          |
| adrenomedullin                                   | ADM         | NM_009627              | Increased                       | 0.78                            | -1.31                                        | 0.10                                          |
| CD151 antigen                                    | CD151       | NM_009842              | Increased                       | 1.03                            | 0.13                                         | 0.21                                          |
| angiopoietin 1                                   | ANGPT1      | NM_009640              | Increased                       | 1.77                            | 0.15                                         | -0.19                                         |
| colony stimulating factor 2                      | CSF2        | NM_009969              | Increased                       | 1.80                            | 0.28                                         | 0.06                                          |
| kininogen 1                                      | KNG1        | NM_001102411           | Increased                       | 2.58                            | -0.08                                        | -0.09                                         |
| calcitonin/calcitonin-related polypeptide, alpha | CALCA       | NM_001033954           | Increased                       | 2.73                            | -0.08                                        | 0.67                                          |
